# Supplementary material for: Chondrogenic primed extracellular vesicles activate miR-455/SOX11/FOXO axis for cartilage regeneration and osteoarthritis treatment
Source: PubMed Central journal article supplement (PMC9481593; doi:10.1038/s41536-022-00250-7), 2022-09-16
Supplement: 41536_2022_250_MOESM1_ESM.pdf [file 41536_2022_250_MOESM1_ESM.pdf]

## Supplementary Information

**Supplementary Table 1. List of all antibodies used in the experiment**

| <b>Antibodies</b> | <b>manufacturers</b> | <b>Catalog Number</b> | <b>species origins</b> | <b>final dilutions</b> |
|-------------------|----------------------|-----------------------|------------------------|------------------------|
| ALIX              | Abcam                | ab275377              | Rabbit                 | 1:1000                 |
| CD9               | Abcam                | ab236630              | Rabbit                 | 1:1000                 |
| CD63              | Abcam                | ab134045              | Rabbit                 | 1:1000                 |
| CD81              | Abcam                | ab109201              | Rabbit                 | 1:1000                 |
| SOX9              | Abcam                | ab185966              | Rabbit                 | 1:1000                 |
| ACAN              | Abcam                | ab232628              | Rabbit                 | 1:1000                 |
| COL2A1            | Abcam                | ab34712               | Rabbit                 | 1:2000                 |
| FOXO1             | Abcam                | ab39670               | Rabbit                 | 1:1000                 |
| SOX11             | Abcam                | ab170916              | Rabbit                 | 1:1000                 |
| MMP13             | Abcam                | ab39012               | Rabbit                 | 1:1000                 |
| p27               | Abcam                | ab32034               | Rabbit                 | 1:1000                 |
| Cathepsin L       | Abcam                | ab200738              | Rabbit                 | 1:1000                 |
| Gadd45a           | Abcam                | ab180768              | Rabbit                 | 1:1000                 |
| $\beta$ -actin    | Abcam                | ab8227                | Rabbit                 | 1:2000                 |

|                                                |       |          |       |        |
|------------------------------------------------|-------|----------|-------|--------|
| Goat Anti-Rabbit IgG<br>H&L (Alexa Fluor® 488) | Abcam | ab150077 | Goat  | 1:500  |
| Goat Anti-Rabbit IgG<br>H&L (HRP)              | Abcam | ab6721   | Goat  | 1:1000 |
| Goat Anti-Rabbit IgG<br>H&L (Alexa Fluor® 647) | Abcam | ab150079 | Goat  | 1:500  |
| FITC Anti-CD29                                 | Abcam | ab150002 | Mouse | 1:2000 |
| FITC Anti-CD34                                 | Abcam | ab78165  | Mouse | 1:2000 |
| FITC Anti-CD45                                 | Abcam | ab27287  | Mouse | 1:2000 |
| FITC Anti-CD90                                 | Abcam | ab124527 | Mouse | 1:2000 |
| FITC Anti-CD105                                | Abcam | ab11415  | Mouse | 1:2000 |

---

**Supplementary Table 2. RT-qPCR primers for amplifying the  
gene makers.**

| <b>Gene name</b> | <b>Forward primer (5' -&gt;3')</b>                  | <b>Reverse primer (5' -&gt;3')</b> |
|------------------|-----------------------------------------------------|------------------------------------|
| SOX9             | GGCAAGCTCTGGAGACTTCTG                               | CCCGTTCTTCACCGACTTCC               |
| ACAN             | AGTGCACAGAGGGGTTTGTC                                | CGTTTGTAGGTGGTGGGGTC               |
| COL2A1           | GGGATCGTGGTGACAAAGGT                                | CTGGGCAGCAAAGTTTCCAC               |
| MMP13            | TCCAGTCTCTATGGTCCAGG                                | CCTCGGAGACTGGTAATGGC               |
| FOXO1            | GAGGGTTAGTGAGCAGGTTACA                              | ACTGCTTCTCTCAGTTCCTGC              |
| Gadd45a          | AGAAGACCGAAAGCGACCC                                 | GTTGATGTCGTTCTCGCAGC               |
| p27              | CTGAACGGAGCTGAAGTCG                                 | TAACCGCGCAGCAGATAGT                |
| Cathepsin L      | AGAGCGTCTACCCCGAACT                                 | CAGAGCTGTAGGAGCTGTGTC              |
| SOX11            | CCTGTCGCTGGTGGATAAGG                                | GTGCAGTAGTCGGGGAECTC               |
| ADAMTS4          | CCTTCAGGAAATTCAGGTACGG                              | CCAAGTAGATGCTCCGGTGG               |
| ADAMTS5          | TGGCTCACGAAATCGGACATT                               | GCATTTGGACCAGGGCTTAG               |
| MMP9             | GCGGAGATTGGGAACCAG                                  | TTGTCGGCGATAAGGAAGG                |
| MMP14            | GAGCATTCCAGTGACCCCTC                                | ACCCTGACTCACCCCATAA                |
| TIMP1            | ATCCGACCTCGTCATCAGG                                 | GCATCCCCTAAGGCTTGAA                |
| TIMP3            | ACCGAGGCTTCACCAAGATG                                | CCATCATAGACGCGACCTGT               |
| FABP4            | AAACTGGTGGTGGAAATGCGT                               | GCGAACTTCAGTCCAGGTCA               |
| CEBPB            | TGACGCAGCGGTTGCTA                                   | CGGCTCTGACTCGCTAAAGT               |
| OCN              | CACCGAGACACCATGAGAGC                                | CTGCTTGGACACAAAGGCTGC              |
| RUNX2            | TCTCCAGGAGGACAGCAAGA                                | CTGCTTGCAGCCTTAAATGACT             |
| Nanog            | TACCTCAGCCTCCAGCAGAT                                | ACCAGGTCTTACCTGTTTGT               |
| Oct4             | GGAAAAGCAACTGCCTCCCT                                | ATGCTGCCCTTGTGGATGTC               |
| GAPDH            | GGACCTGACCTGCCGTCTAG                                | GTAGCCCAGGATGCCCTTGA               |
| miR-455-5p       | CGCGTATGTGCCTTTGGACT                                | GTCGTATCCAGTGCAGGGTC               |
| RT-Primer        | GTCGTATCCAGTGCAGGGTCCGAGGTATTTCGCACTGGATACGACCGATGT |                                    |
| miR-146a-5p      | CGCGTGAGAACTGAATTCCATG                              | GTCGTATCCAGTGCAGGGTC               |
| RT-Primer        | GTCGTATCCAGTGCAGGGTCCGAGGTATTTCGCACTGGATACGACAACCCA |                                    |
| miR-557          | GATGTGTTTGCACGGGTGG                                 | GTCGTATCCAGTGCAGGGTC               |
| RT-Primer        | GTCGTATCCAGTGCAGGGTCCGAGGTATTTCGCACTGGATACGACAGACAA |                                    |
| miR-146b-5p      | GCGTGAGAACTGAATTCCATAGG                             | GTCGTATCCAGTGCAGGGTC               |
| RT-Primer        | GTCGTATCCAGTGCAGGGTCCGAGGTATTTCGCACTGGATACGACCAGCCT |                                    |
| miR-126-5p       | CGCGCATTACTTTTGGTACG                                | GTCGTATCCAGTGCAGGGTC               |
| RT-Primer        | GTCGTATCCAGTGCAGGGTCCGAGGTATTTCGCACTGGATACGACCGCGTA |                                    |

**Supplementary Table 3. The recipe of generated T3-EV composite hydrogel for cartilage repair**

|                           | <b>EV<br/>concentration</b>                      | <b>Gelatin</b> | <b>Fibrinogen</b> | <b>HA</b> | <b>Glycerol</b> | <b>BMSC<br/>density</b> |
|---------------------------|--------------------------------------------------|----------------|-------------------|-----------|-----------------|-------------------------|
| <b>T3-EV<br/>hydrogel</b> | T3-EV<br>( $10 \times 10^8$ particles/ml)        | 45 mg/ml       | 30 mg/ml          | 3 mg/ml   | 10% v/v         | $1 \times 10^6$ /ml     |
| <b>un-EV<br/>Hydrogel</b> | Untreated-EV<br>( $10 \times 10^8$ particles/ml) | 45 mg/ml       | 30 mg/ml          | 3 mg/ml   | 10% v/v         | $1 \times 10^6$ /ml     |
| <b>Control</b>            | None                                             | 45 mg/ml       | 30 mg/ml          | 3 mg/ml   | 10% v/v         | $1 \times 10^6$ /ml     |

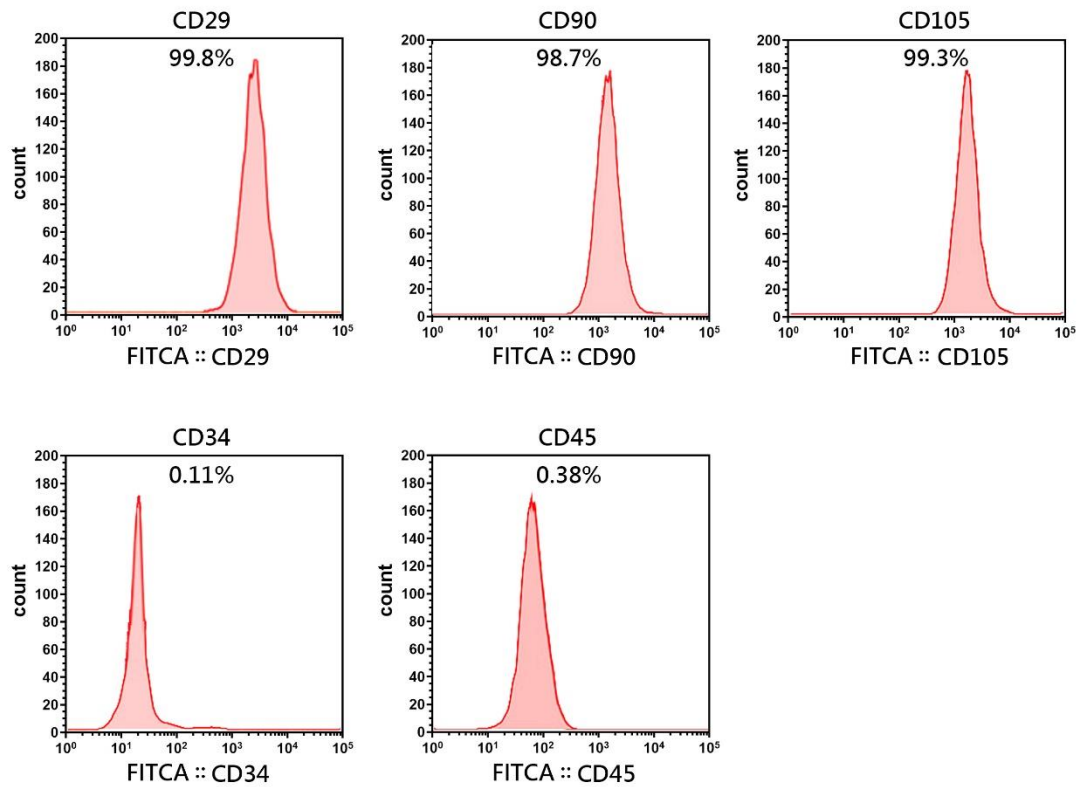

**Supplementary Figure 1.** Characterization of the isolated BMSCs. BMSCs surface markers (CD29, CD34, CD45, CD90 and CD105) were assessed by flow cytometry.

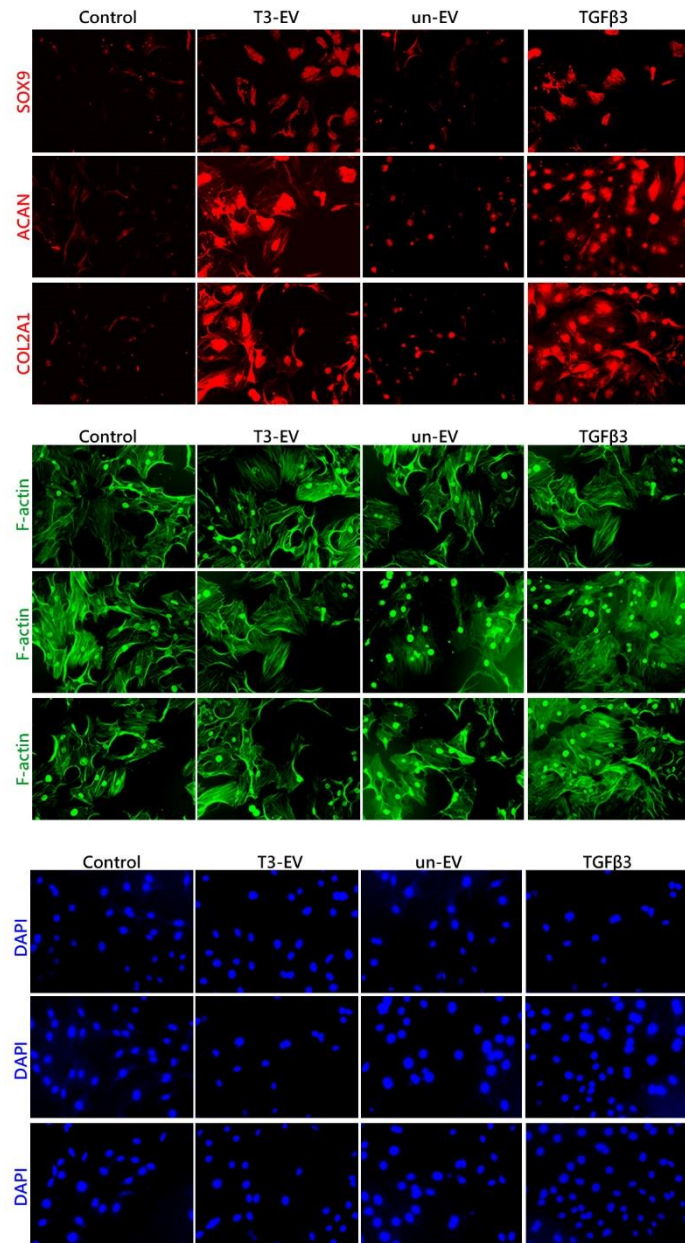

Supplementary Figure 2. Each channel presented for Figure 1G

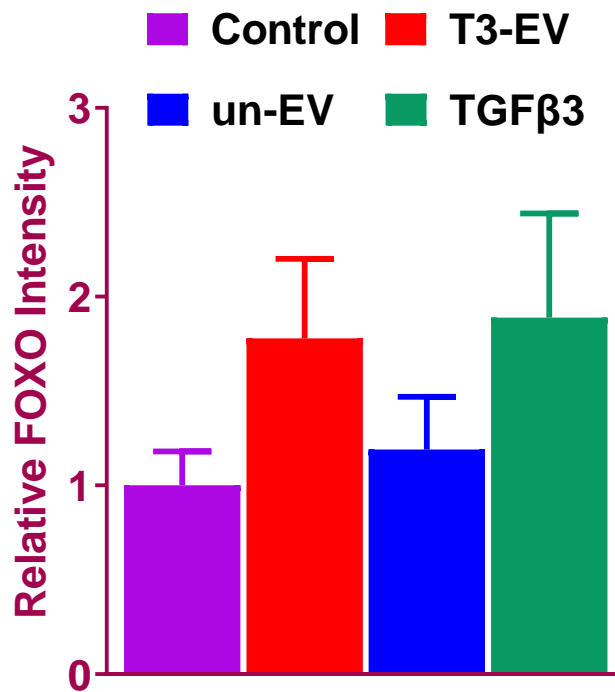

**Supplementary Figure 3.** Levels of protein expression as determined by western blot in Figure 3F. The graph shows different protein level relative to the level of the control in Figure 3F; n=3.

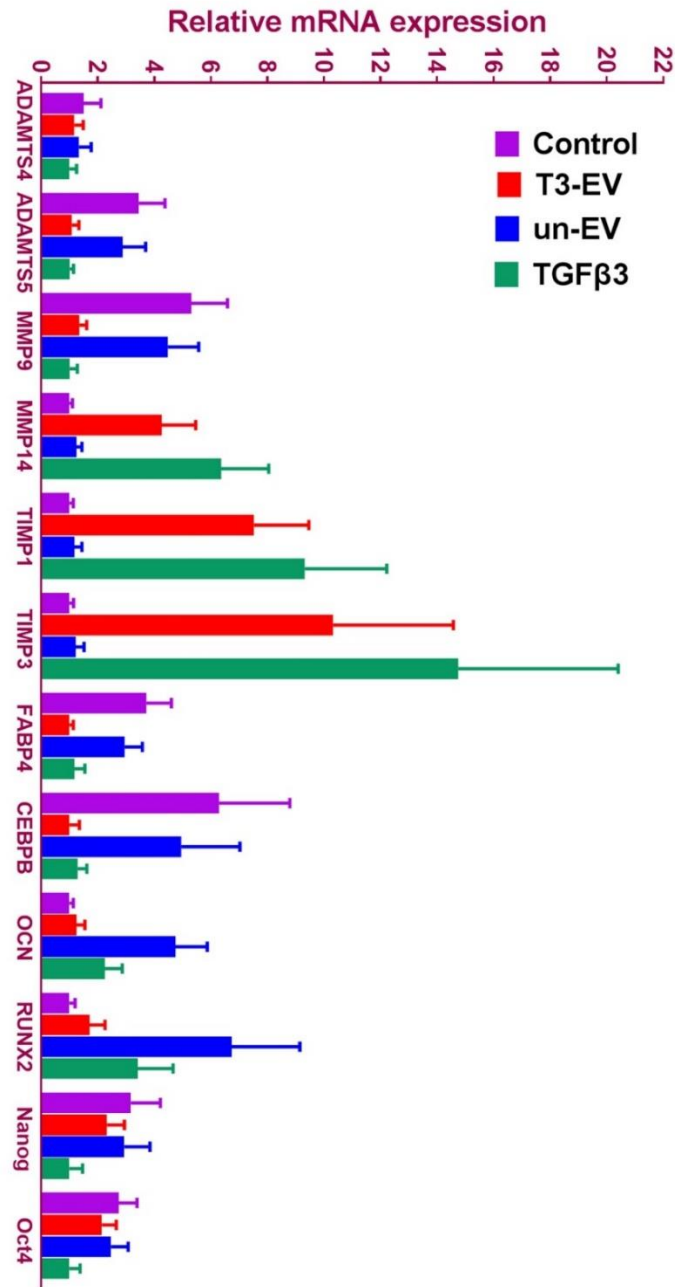

**Supplementary Figure 4.** Quantification of gene expression with the same BMSCs and the same EVs (n=3 for each) with qRT-PCR for ECM remodeling genes (ADAMTS4, ADAMTS5, MMP9, MMP14, TIMP1, TIMP3) adipogenesis-related genes (FABP4, CEBPB), osteogenesis-related genes (OCN, RUNX2) and pluripotency genes (Nanog, Oct4)



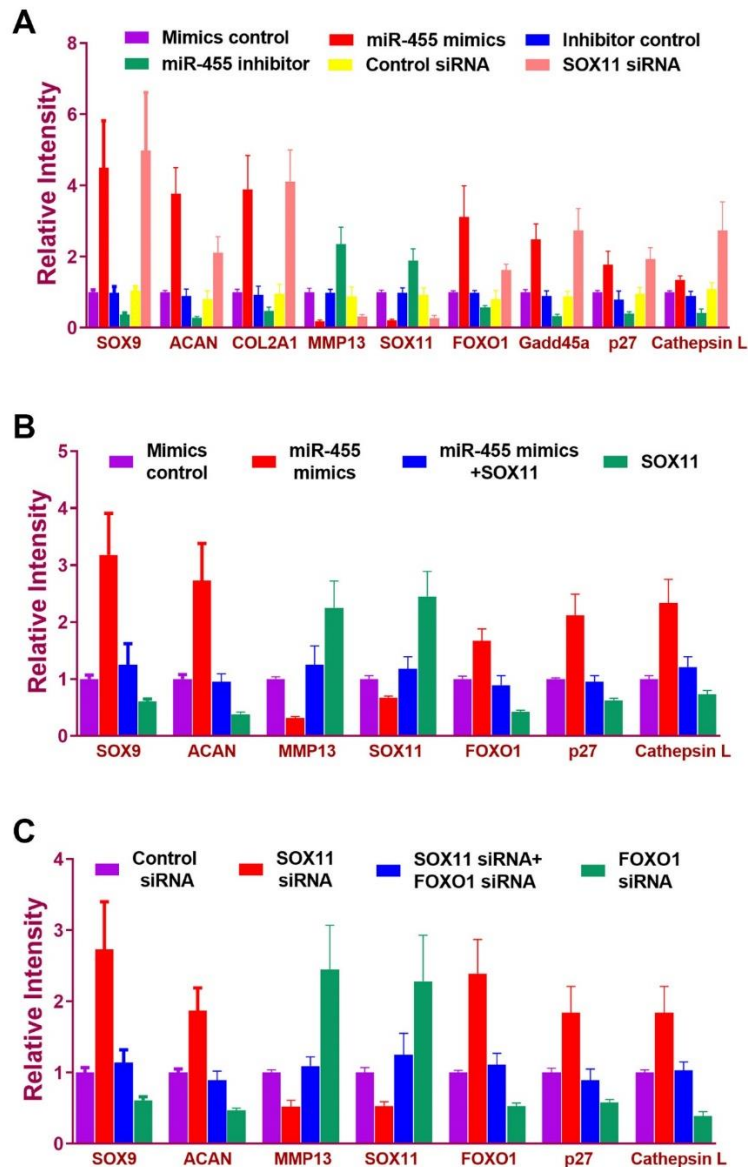

**Supplementary Figure 5. Levels of protein expression as determined by western blot in Figure 5C-E. A.** The graph shows different protein level relative to the level by treatment with mimics control in **Figure 5C**; n=3. **B.** The graph shows different protein level relative to the level by treatment with mimics control in **Figure 5D**; n=3. **C.** The graph shows different protein level relative to the level by treatment with control siRNA in **Figure 5E**; n=3.

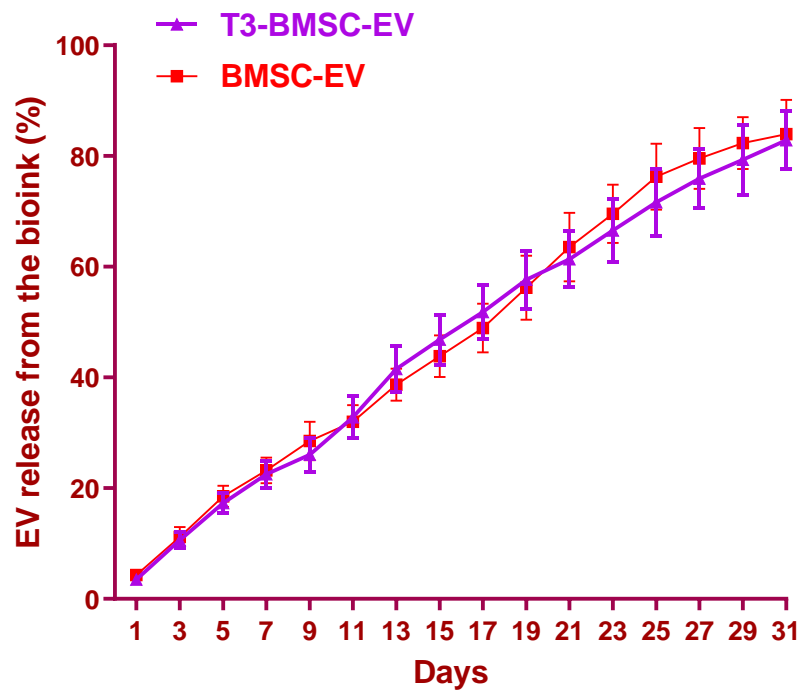

**Supplementary Figure 6.** EV release rate from the hydrogel bioink in a month.

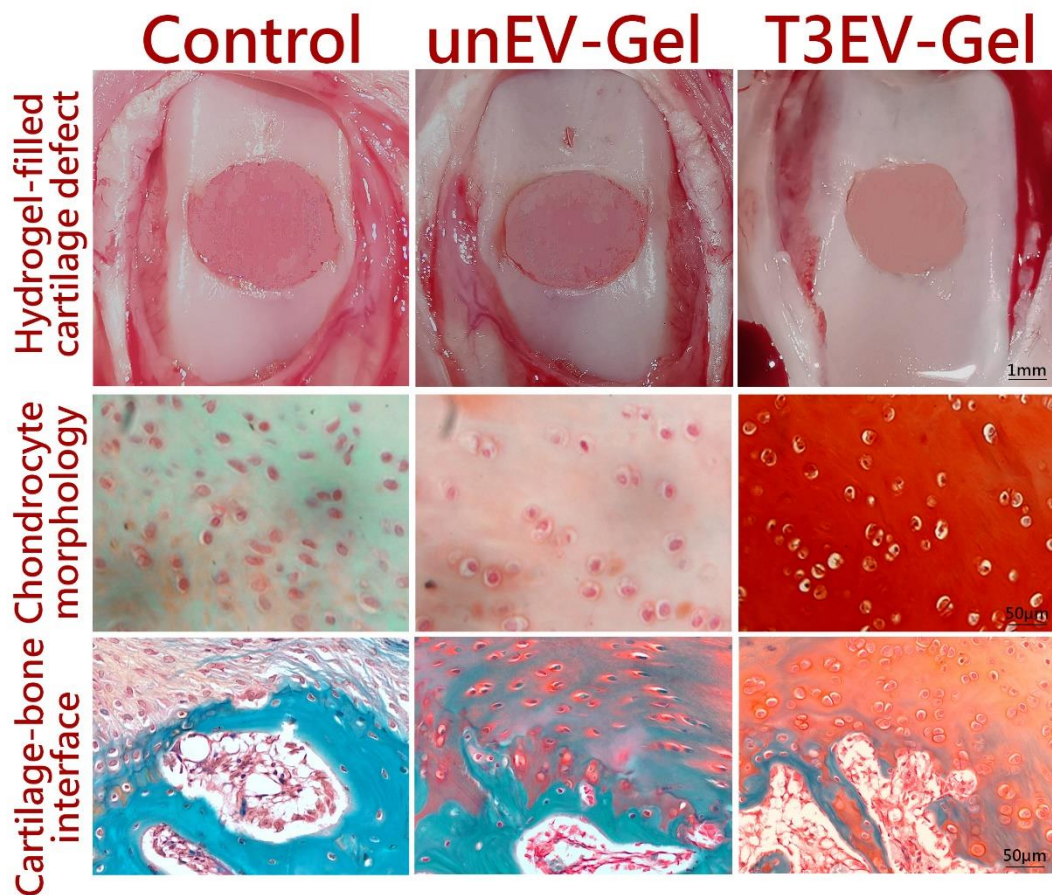

**Supplementary Figure 7.** Higher-resolution of chondrocyte morphology and cartilage-bone interface in the cartilage repair model. **1<sup>st</sup> row:** Gross appearance of hydrogel-filled cartilage defect at baseline. **2<sup>nd</sup> row:** Higher-resolution of chondrocyte morphology in the repaired cartilage; **3<sup>rd</sup> row:** Cartilage-bone interface in different groups in the repaired tissues.

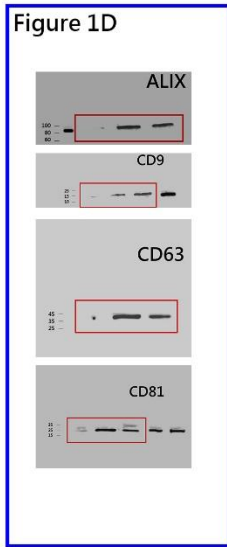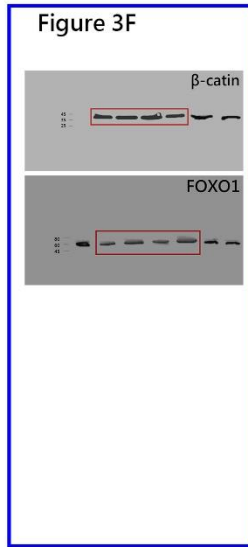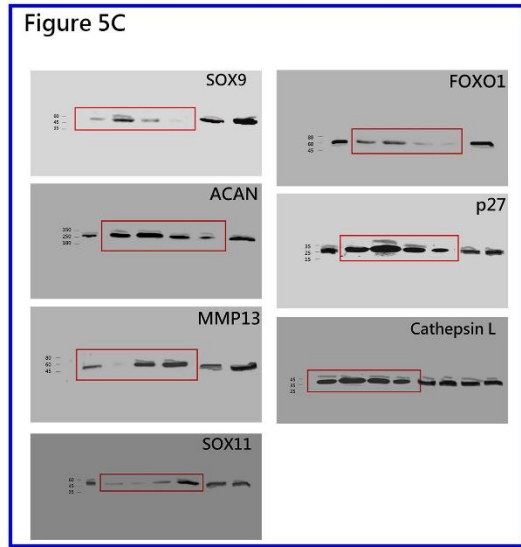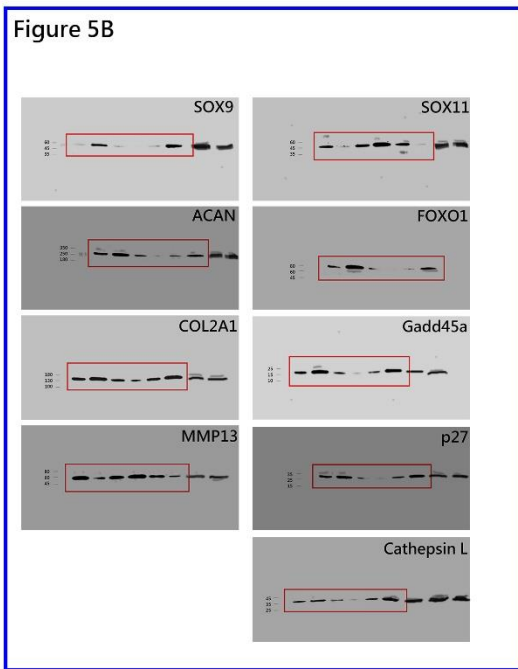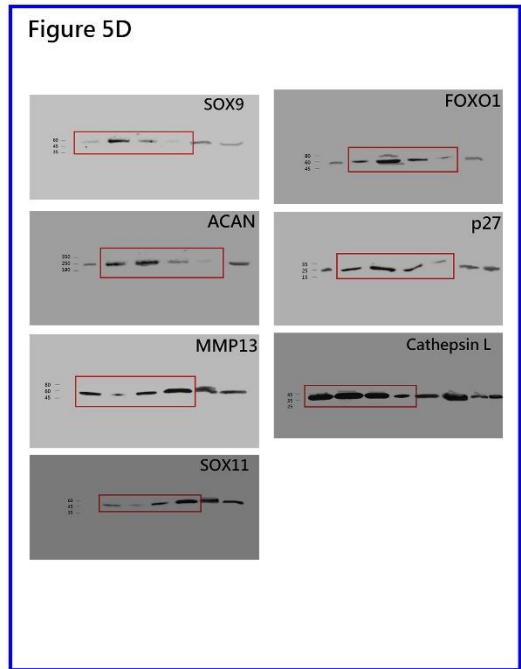

**Supplementary Figure 8.** Uncropped blots relate to figures in this study. Red square frames indicate the representative bands used in the main text.
